# Supplementary material
Source: PubMed Central journal article supplement (PMC7296539)

## Supplementary Information

### Metabolomic description of ivacaftor elevating polymyxin B mediated antibacterial activity in cystic fibrosis *Pseudomonas aeruginosa*

Rafah Allobawi#, Drishti P. Ghelani#, Elena K. Schneider-Futschik\*

Department of Pharmacology & Therapeutics, School of Biomedical Sciences, Faculty of Medicine, Dentistry and Health Sciences, The University of Melbourne, Parkville, VIC, 3010, Australia

#These authors contributed equally to this work

\*Senior author and Correspondence: [elena.schneider@unimelb.edu.au](mailto:elena.schneider@unimelb.edu.au)

#### Table of content

-number of pages: 9

-number of figures: Figure S1-5

-number of tables: Table S1

**Table S1.** Data precision of individual samples represented as the median relative standard deviation (RSD) for all metabolites of *P. aeruginosa* FADDI-PA111 & FADDI-PA006 based on all replicates (n=4) of each group (n=19 for technical replicates of PBQCs).

| <b>FADDI-PA111</b> |                     |           |           |
|--------------------|---------------------|-----------|-----------|
|                    | <b>Median RSD %</b> |           |           |
|                    | <b>1h</b>           | <b>3h</b> | <b>6h</b> |
| <b>Control</b>     | 22                  | 22        | 19        |
| <b>Polymyxin B</b> | 19                  | 21        | 19        |
| <b>Ivacaftor</b>   | 27                  | 25        | 16        |
| <b>COM</b>         | 27                  | 24        | 22        |

  

| <b>FADDI-PA006</b> |                     |           |           |
|--------------------|---------------------|-----------|-----------|
|                    | <b>Median RSD %</b> |           |           |
|                    | <b>1h</b>           | <b>3h</b> | <b>6h</b> |
| <b>Control</b>     | 22                  | 18        | 19        |
| <b>Polymyxin B</b> | 20                  | 15        | 18        |
| <b>Ivacaftor</b>   | 15                  | 18        | 17        |
| <b>COM</b>         | 20                  | 22        | 23        |

**Figure S1.** Multivariate analyses of global metabolic changes. PLSDA score plots for metabolite levels of **(A)** FADDI-PA111 and **(B)** FADDI-PA006 samples treated with polymyxin B, ivacaftor and the combination. Each data set represents a total of 16 samples of 4 biological replicates of each condition. Green = control (untreated) ; Cyan = polymyxin B alone (PMB); Purple = ivacaftor (IVA); Red = polymyxin B and ivacaftor combination (COM).

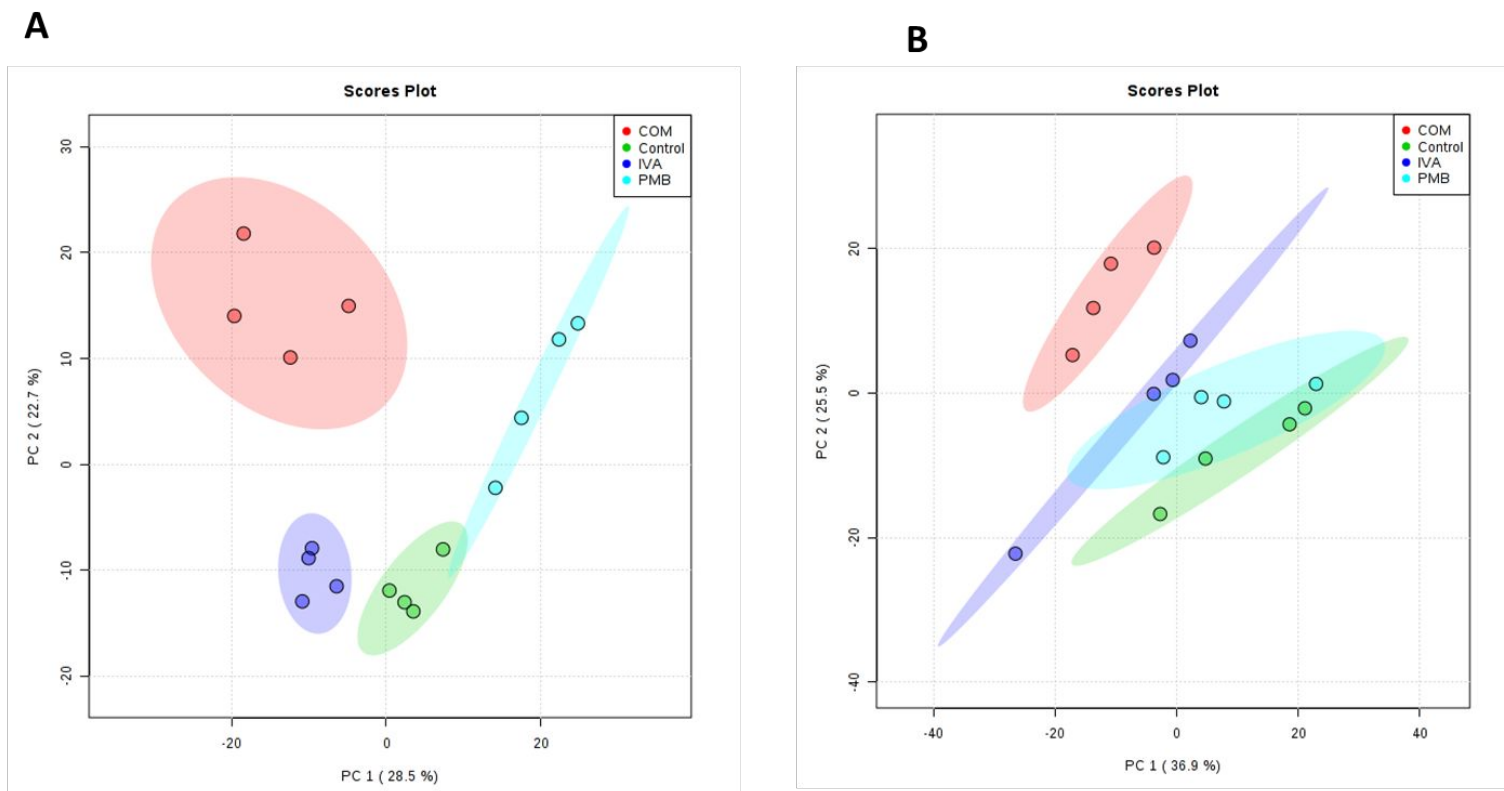

**Figure S2.** Monotherapy and combination (COM) of polymyxin B (PMB) and ivacaftor (IVA) induce global metabolic changes. Heatmap profiles of all identified metabolites after treatment of (A) *P. aeruginosa* FADDI-PA111 and (B) FADDI-PA006 with single and combination of polymyxin B and ivacaftor.

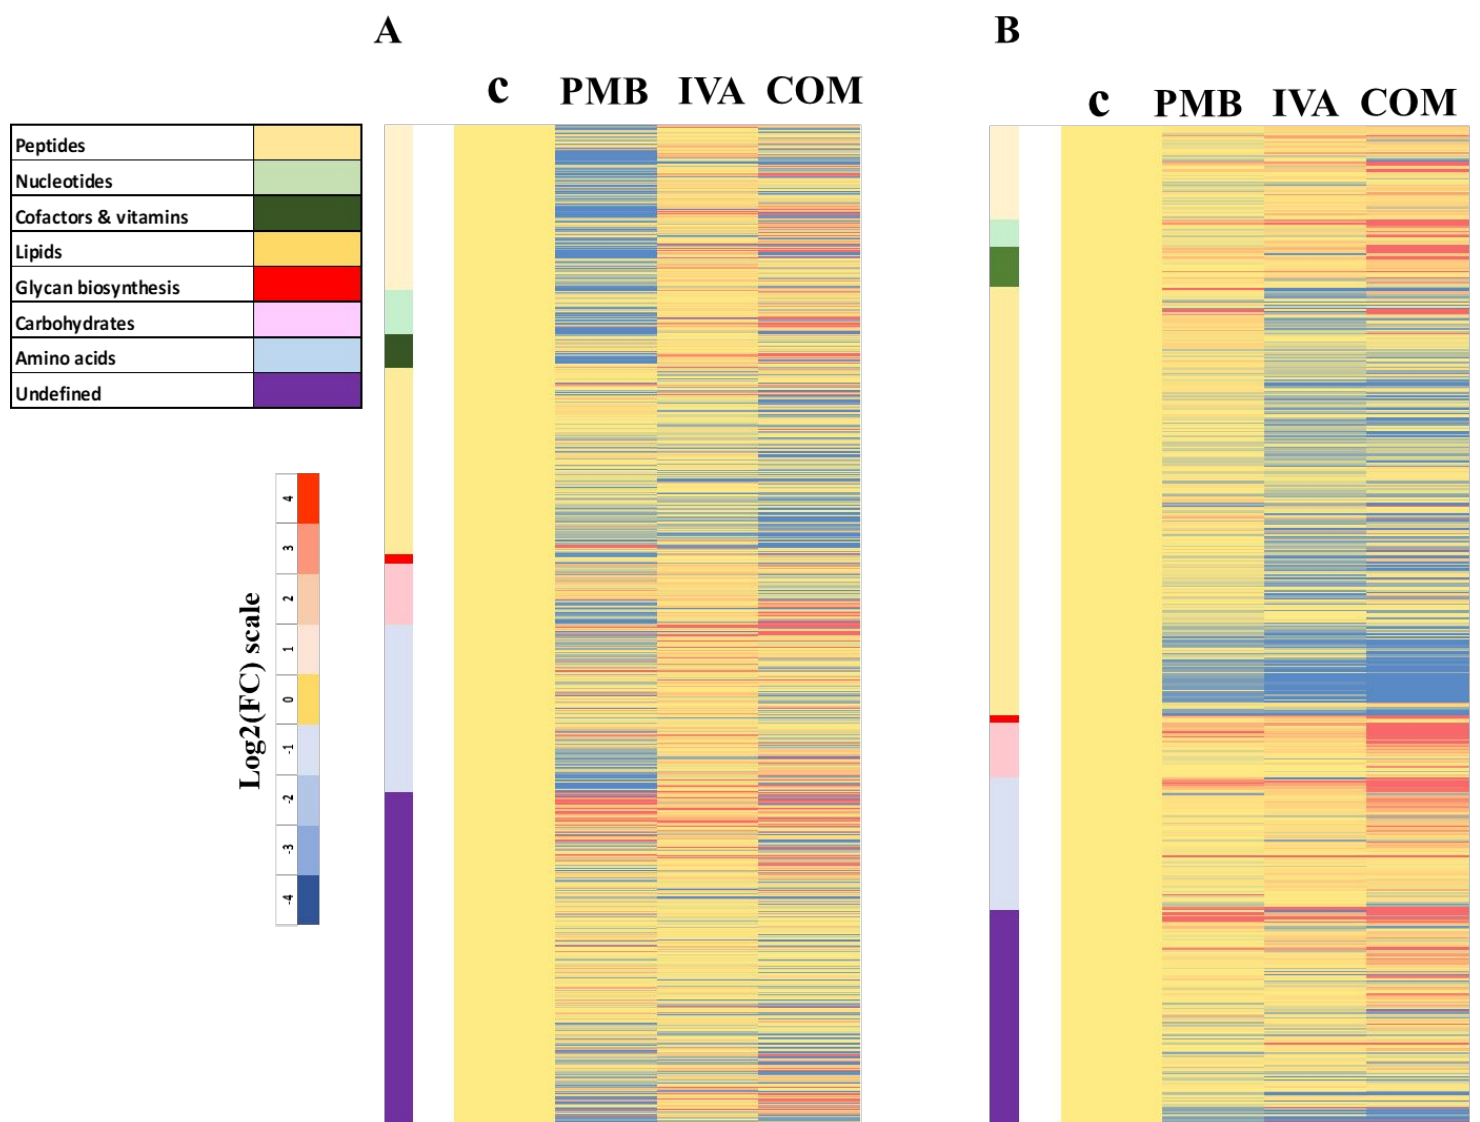

**Figure S3.** The proportion of different metabolites classes identified in FADDI-PA111 and FADDI-PA006 following treatment with polymyxin B and ivacaftor.

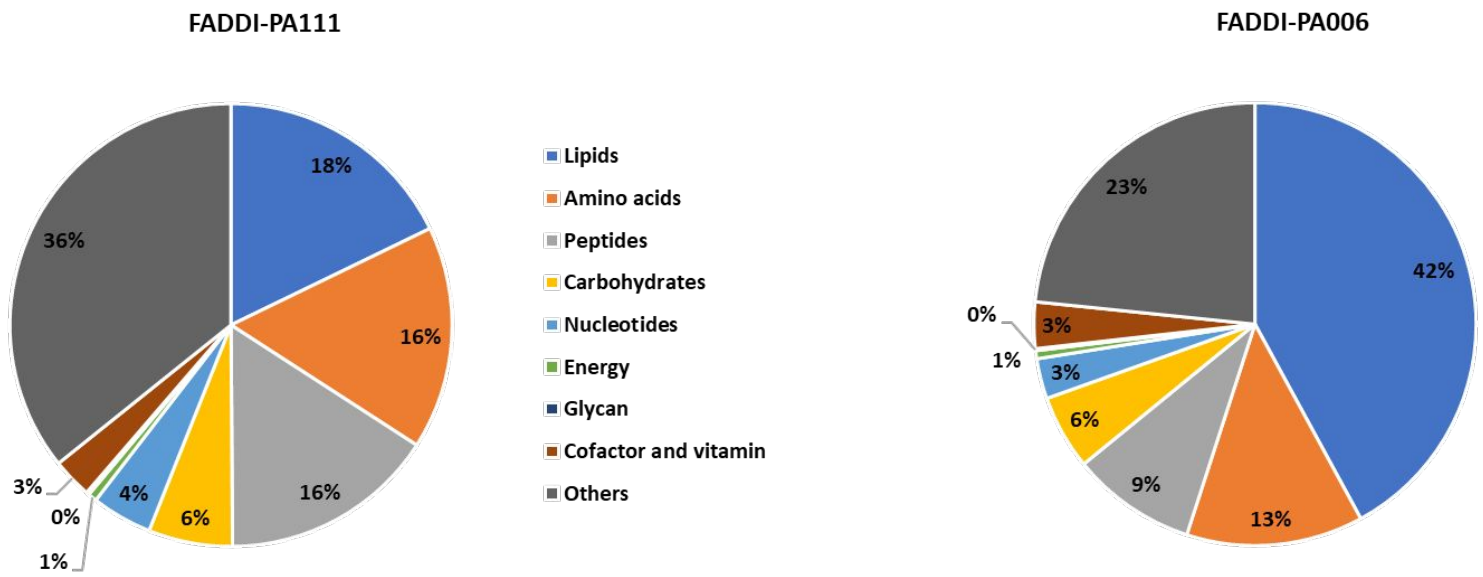

**Figure S4.** Summary number of significant metabolites after antibiotic monotherapy and combination (COM) treatment of FADDI-PA111 and FADDI-PA006. Changes ( $\geq 0.59$ -log<sub>2</sub>-fold,  $p \leq 0.05$ ; FDR  $\leq 0.1$ ).

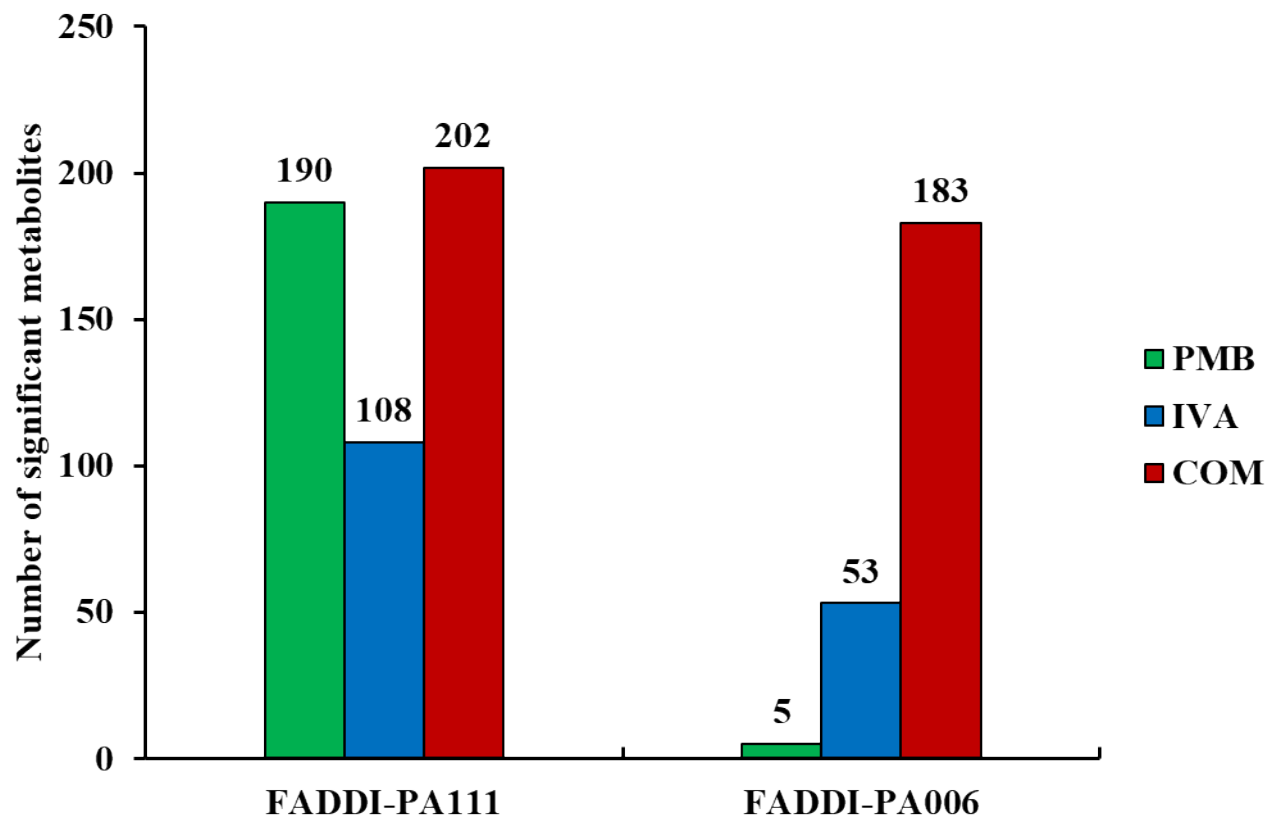

**Figure S5.** Time-kill kinetics of polymyxin B and ivacaftor alone and in combination against *P. aeruginosa* (A) FADDI-PA111 and (B) FADDI-PA006.

**A**

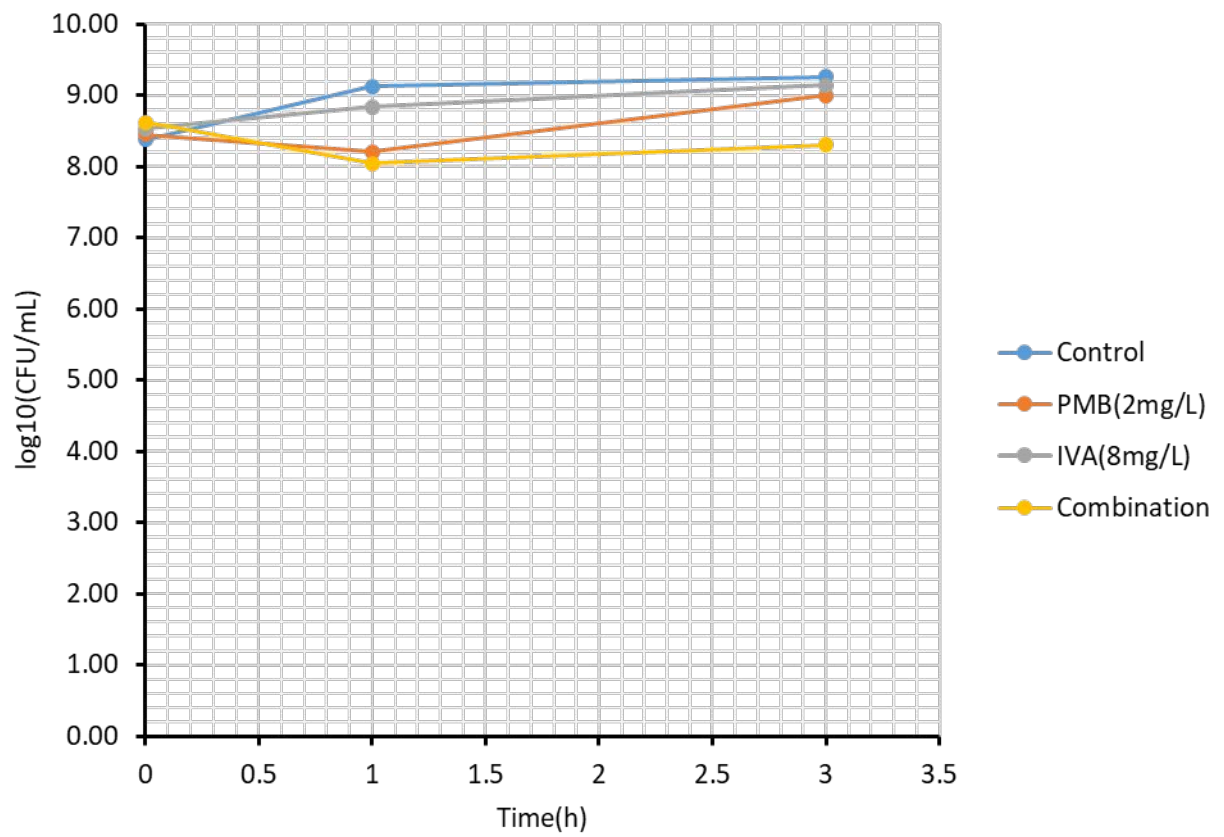

**B**

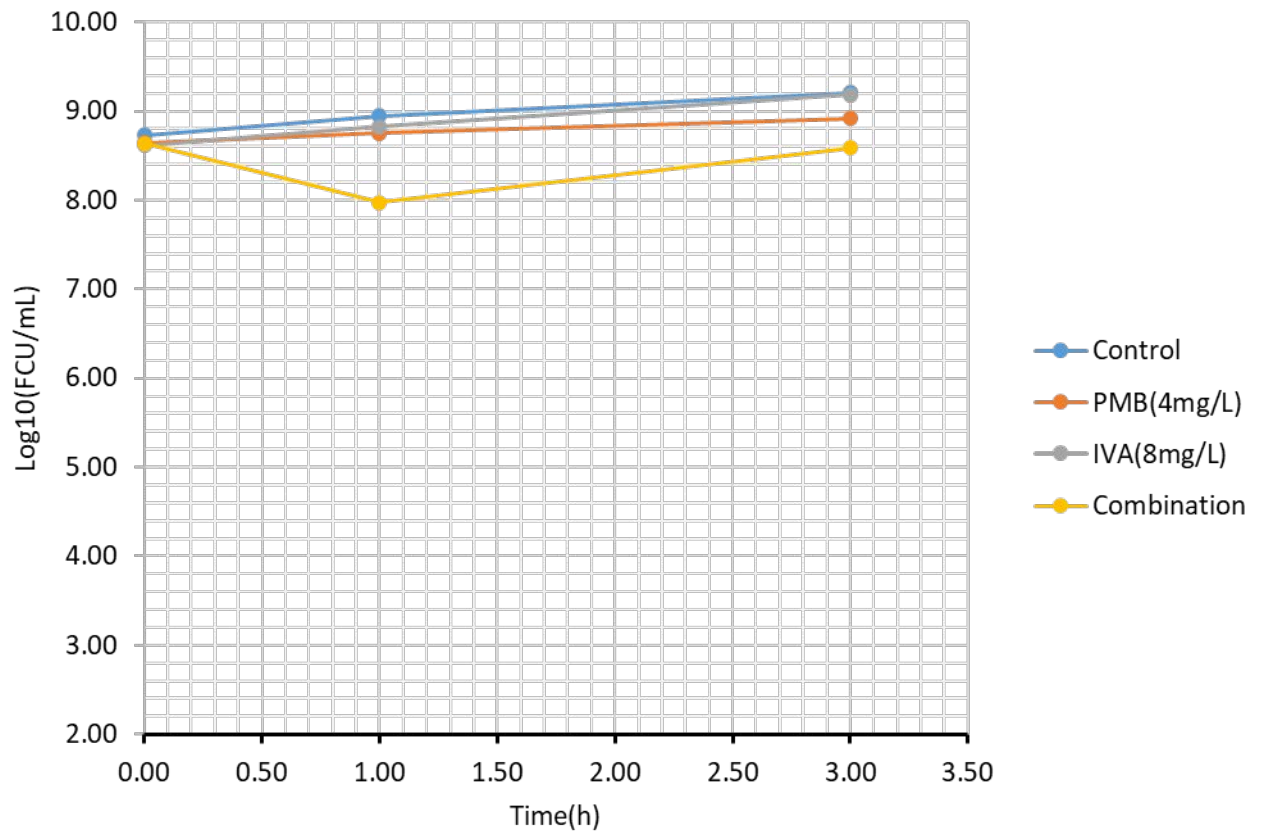

Supplement: pt0c00030_si_001.pdf [file pt0c00030_si_001.pdf]
